# Supplementary material
Source: Springer Nature journal article supplement (https://www.springermedizin.de/resource/supplementary/12906_2010_307_MOESM4_ESM.pdf/9519386)

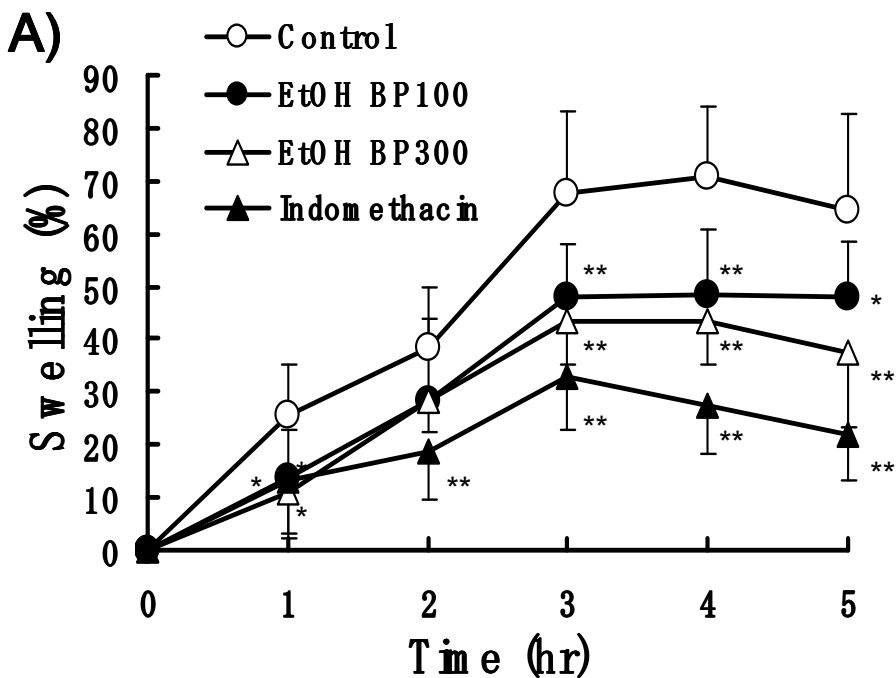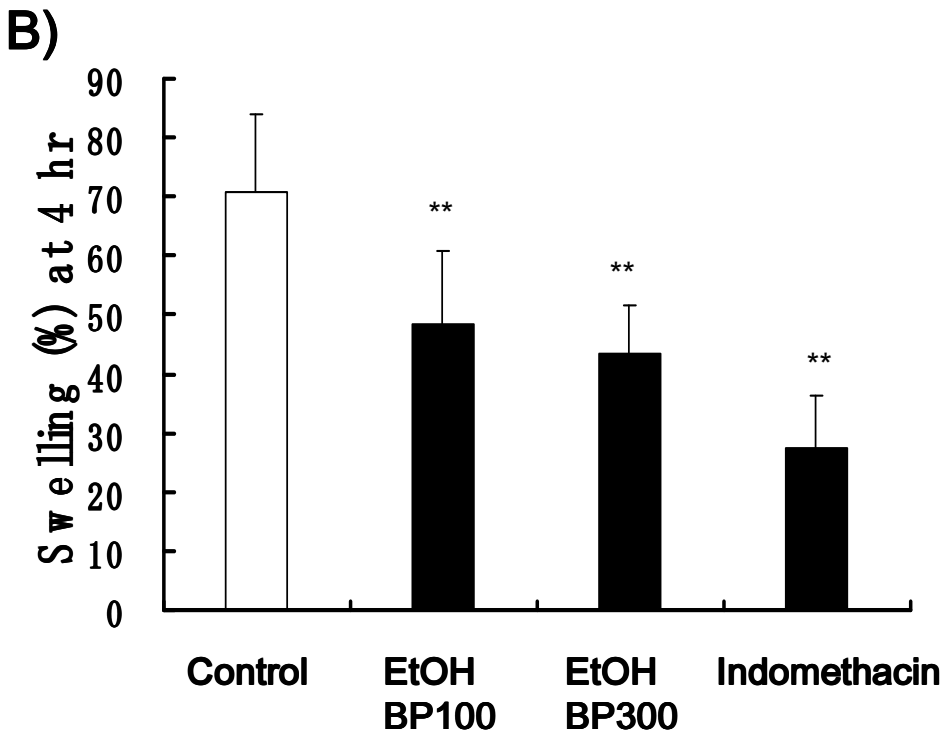

Supplement: MOESM4 [file 9519386]
